# Supplementary material for: A multistimuli-responsive fluorescent switch in the solution and solid states based on spiro[fluorene-9,9′-xanthene]-spiropyran
Source: Royal Society of Chemistry journal article supplement (doi:10.1039/c9tc02129a), 2019-01-01
Supplement: c9tc02129a1.pdf [file c9tc02129a1.pdf]

**A Multistimuli-Response Fluorescent Switch in the Solution and  
Solid State Based on Spiro[fluorene-9,9' -xanthene] -  
Spiropyran**

Lingyun Wang \*, Wei Xiong, Hao Tang, Derong Cao

School of Chemistry and Chemical Engineering, South China University of Technology,

Guangzhou, China, 510640

\*Corresponding author: Tel. +86 20 87110245; fax: +86 20 87110245. E-mail:

lingyun@scut.edu.cn

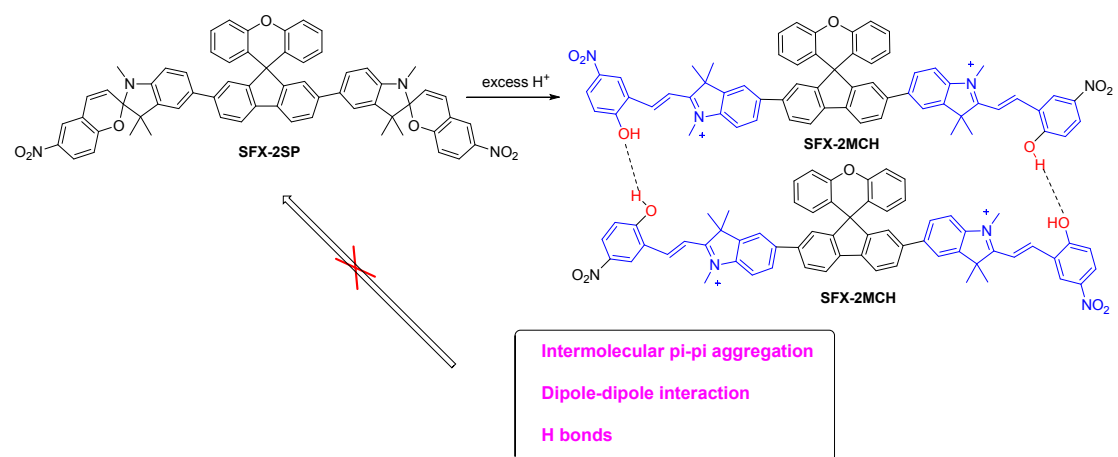

Scheme S1 The possible interactions of **SFX-2MCH** when **SFX-2SP** powder was exposed to excess gaseous HCl.

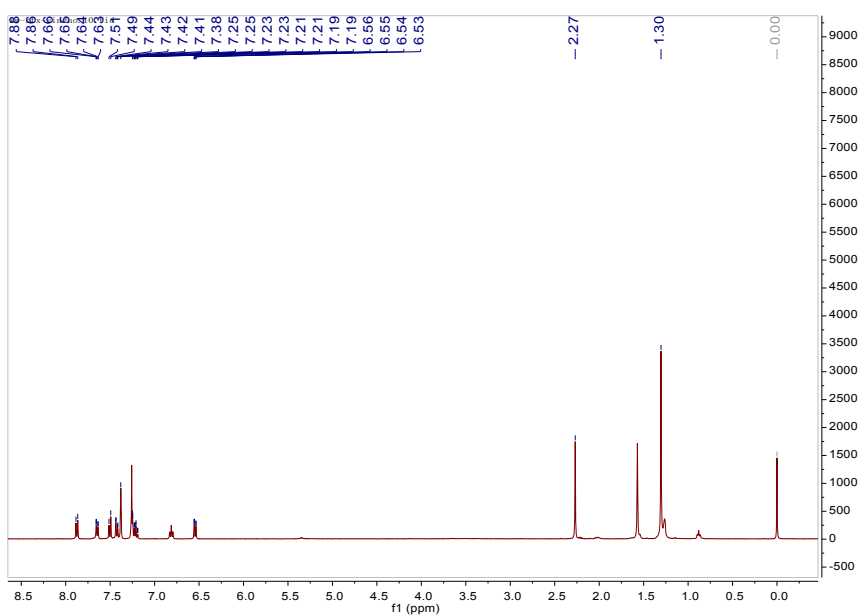

Figure S1  $^1\text{H}$  NMR spectrum of compound **3** in  $\text{CDCl}_3$

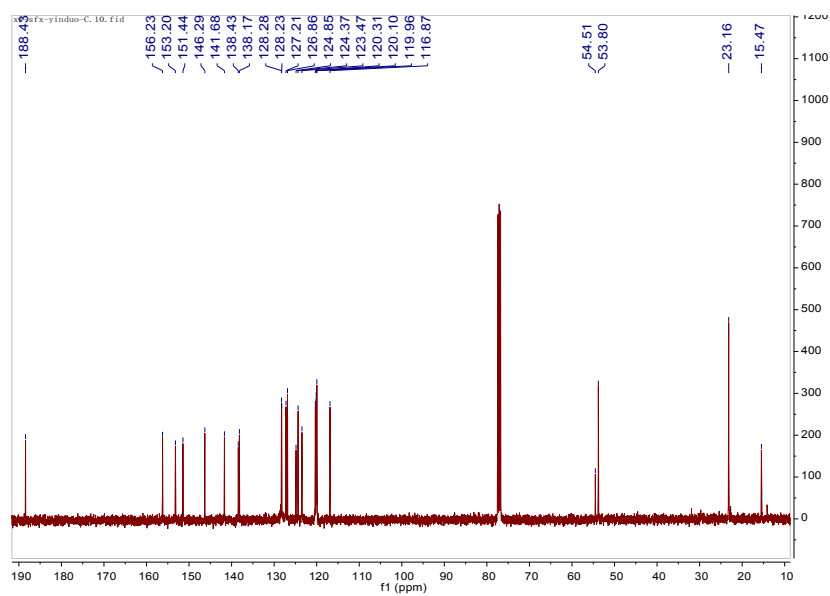

Figure S2  $^{13}\text{C}$  NMR spectrum of compound **3** in  $\text{CDCl}_3$

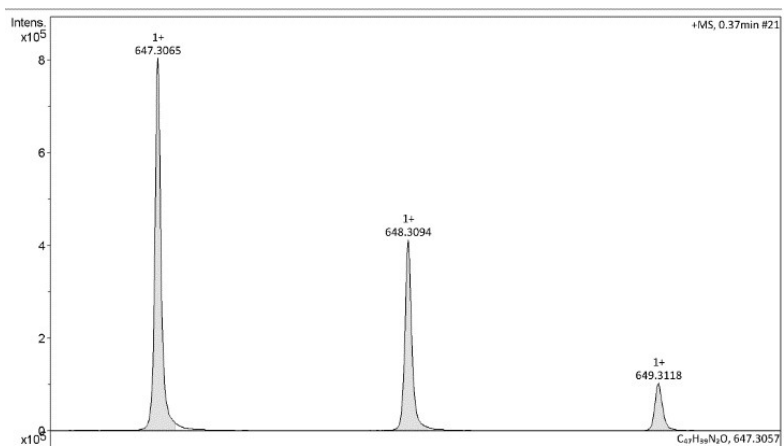

Figure S3 HRMS spectrum of compound 3

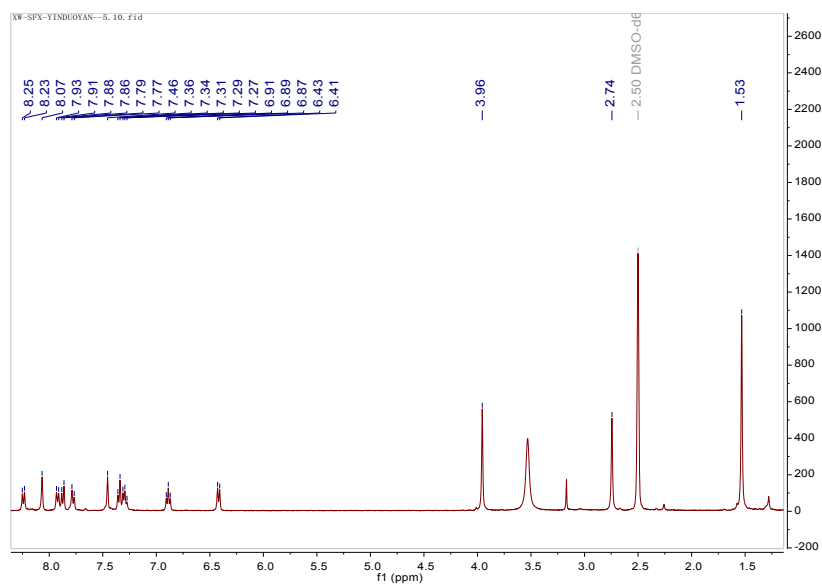

Figure S4 <sup>1</sup>H NMR spectrum of compound 4 in DMSO-*d*<sub>6</sub>

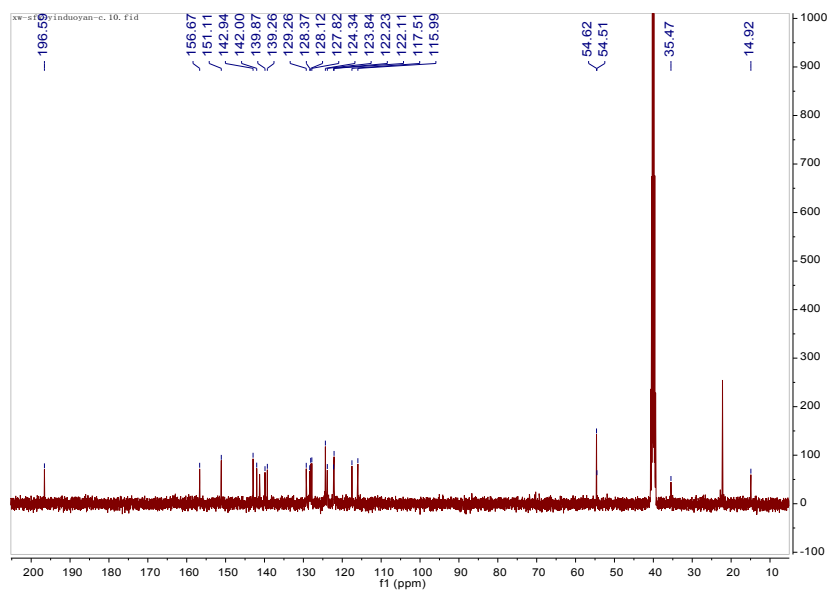

Figure S5  $^{13}\text{C}$  NMR spectrum of compound 4 in  $\text{DMSO-}d_6$

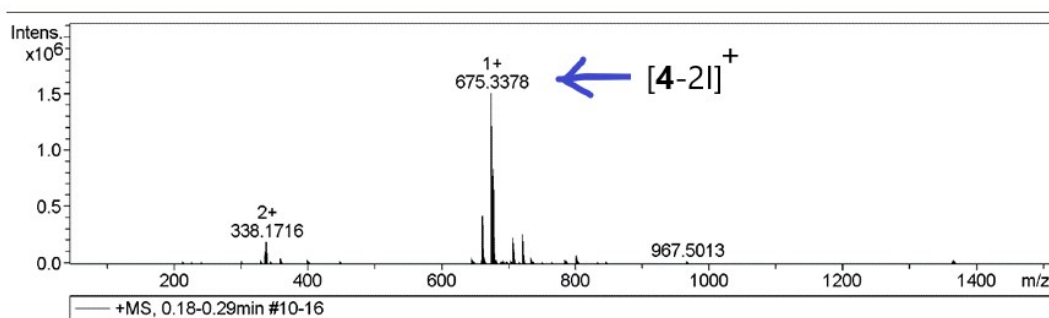

Figure S6 HRMS spectrum of compound 4

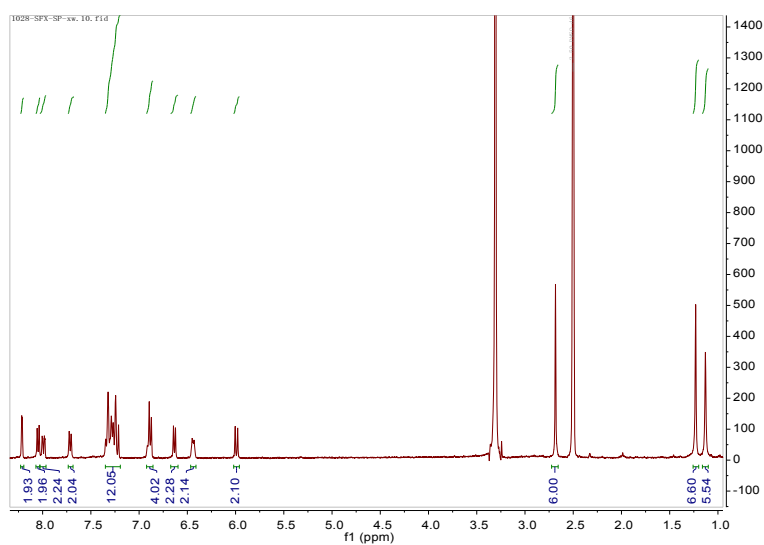

Figure S7  $^1\text{H}$  NMR spectrum of SFX-2SP in  $\text{DMSO-}d_6$

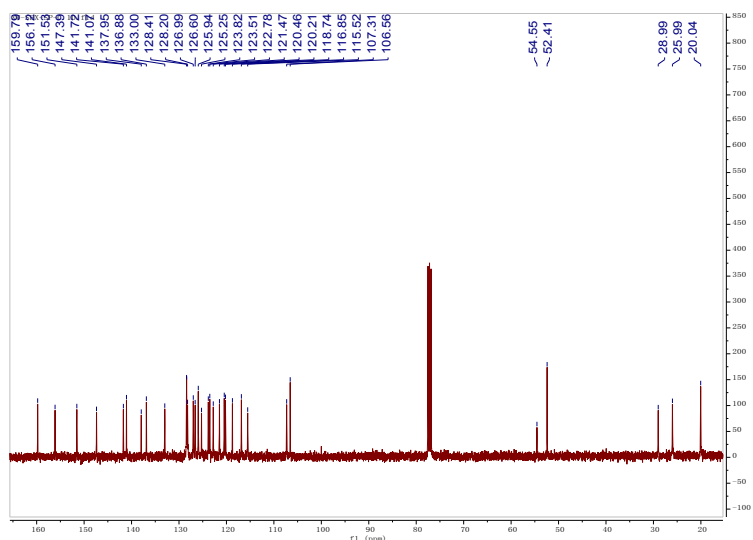

Figure S8  $^{13}\text{C}$  NMR spectrum of **SFX-2SP** in  $\text{CDCl}_3$ .

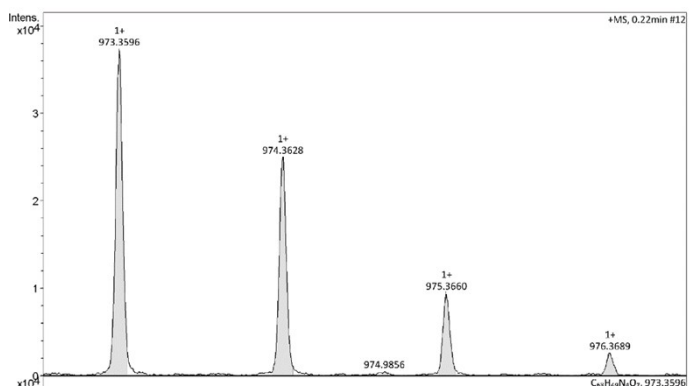

Figure S9 HRMS spectrum of **SFX-2SP**.

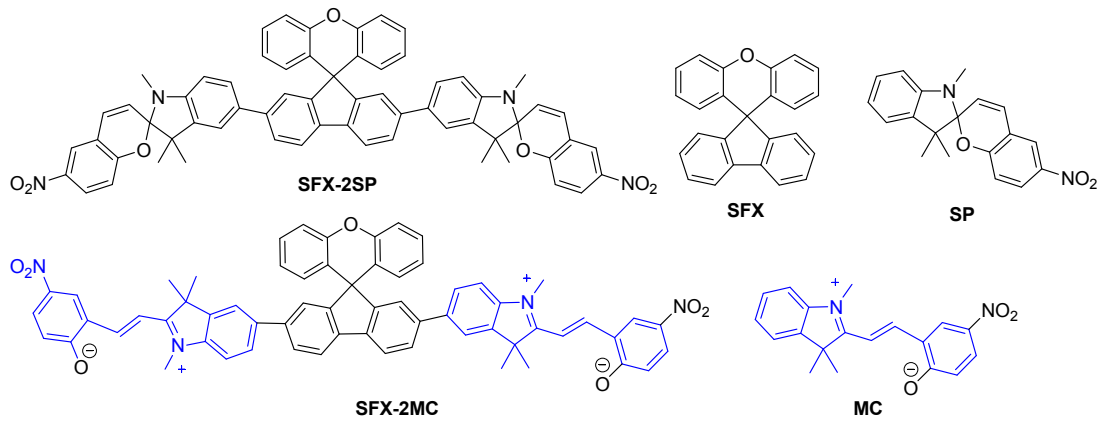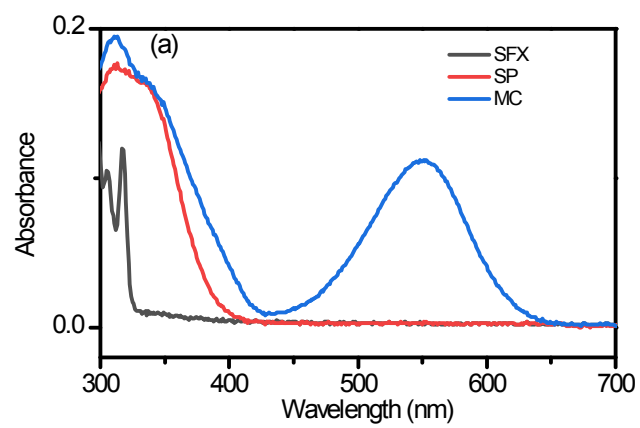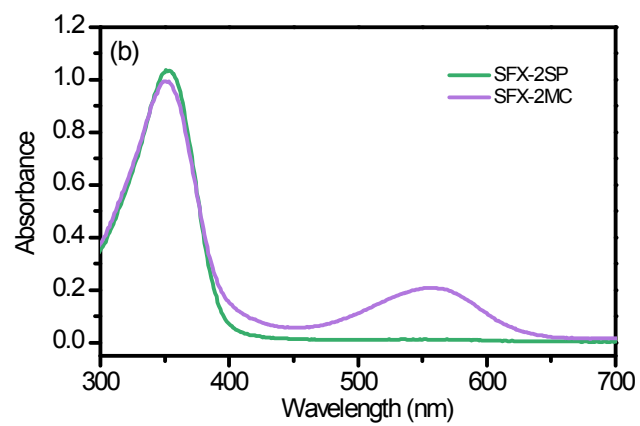

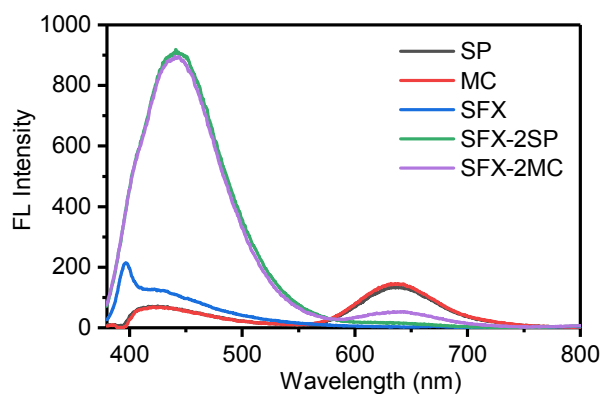

Figure S10. UV-vis and emission spectra of **SPF**, **SP**, **SFX-2SP** and **SFX-2MC** in EtOH.

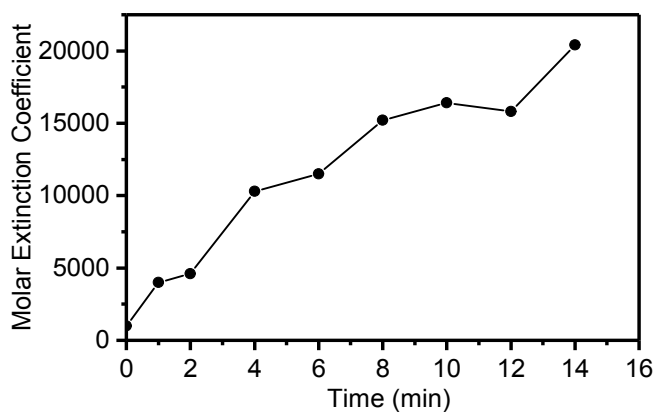

Figure S11 The molar extinction coefficient at 557 nm for **SPF-2SP** in EtOH with different 365 nm irradiation time.



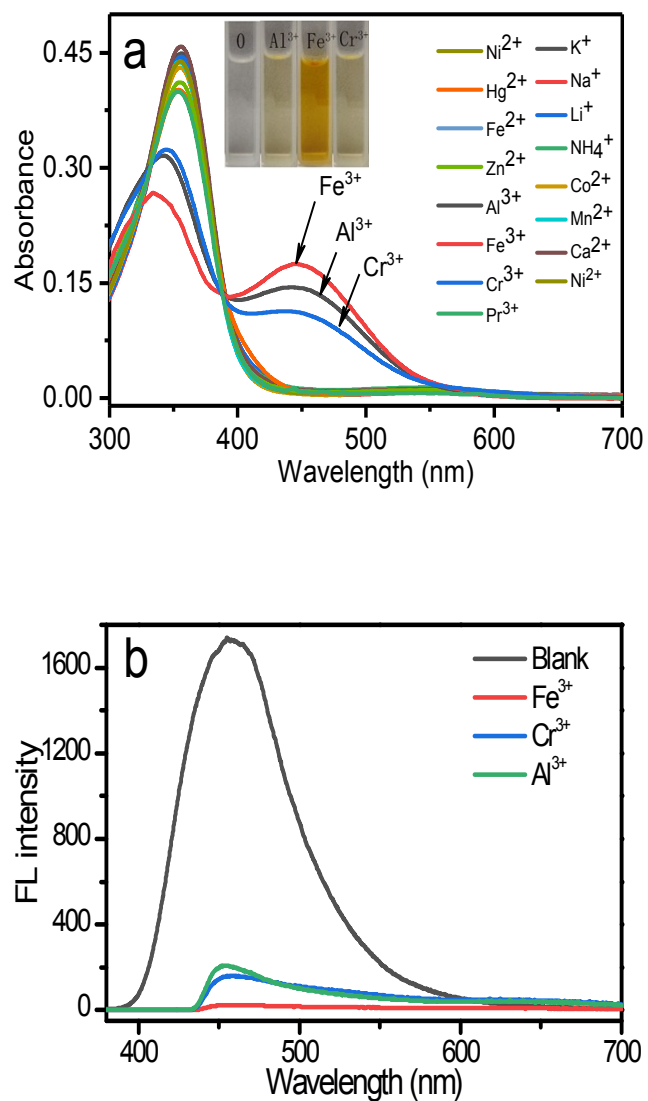

Figure S12(a) The absorption and (b) PL spectra of **SFX-2SP** (6 μM) in EtOH-H<sub>2</sub>O (9:1, v/v) with different metal ions (1mM). Insets: The pictures of corresponding solutions in ambient light.

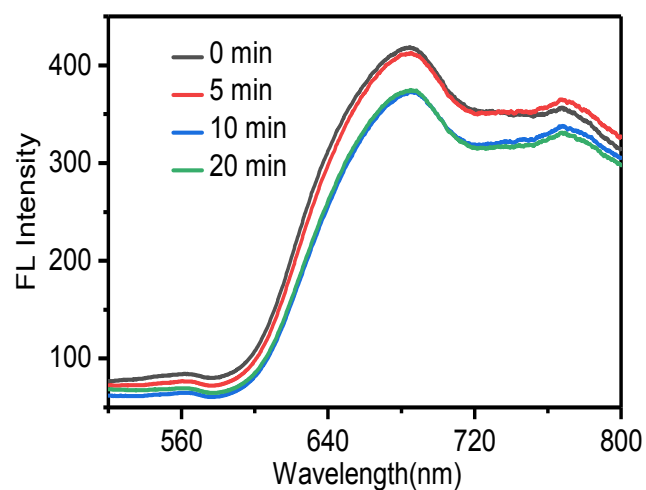

Figure S13 The PL spectra of **SFX-2SP** solid with different 365 nm irradiation time.

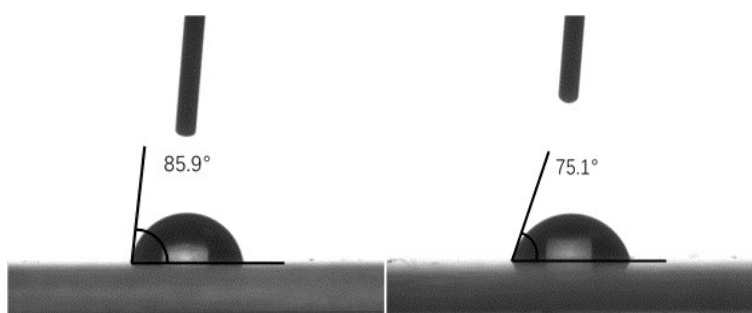

Figure S14 Contact angle of the surface of the **SFX-2SP** film (a) before and (b) after UV light irradiation.

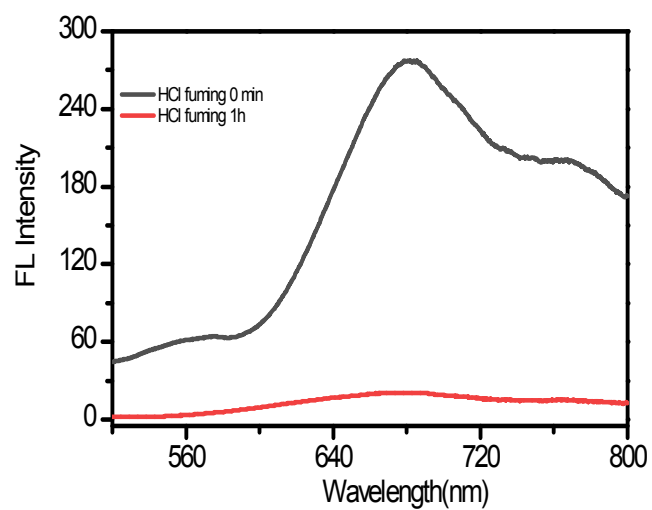

Figure S15 The PL spectra of **SFX-2SP** solid with HCl fuming.

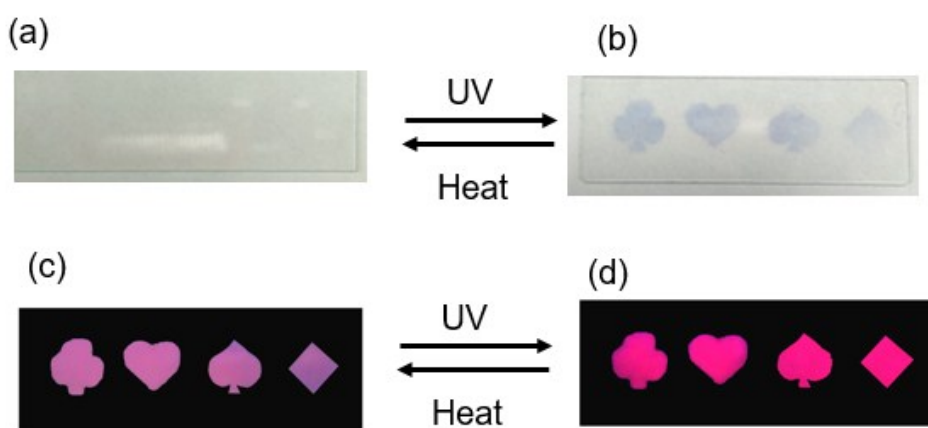

Figure S16 Application of information encryption and decryption with 1 wt% **SFX-2SP**-loaded PMMA film by UV irradiation and heat.

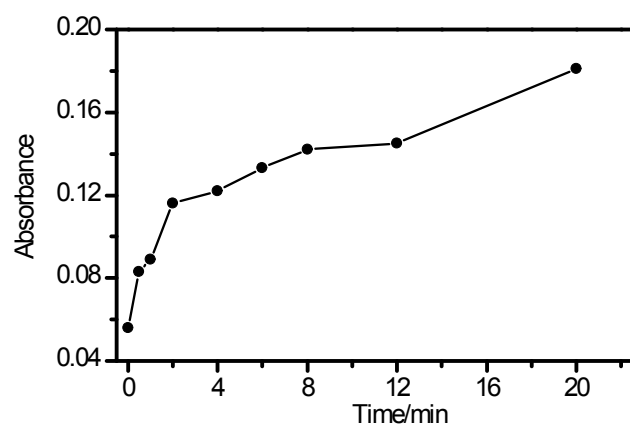

Figure S17 The molar extinction coefficient of **SPF-2SP** in PMMA -based film with different 365 nm irradiation time.

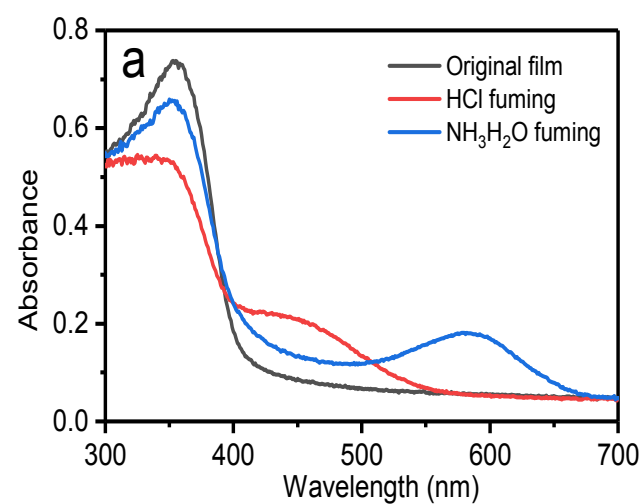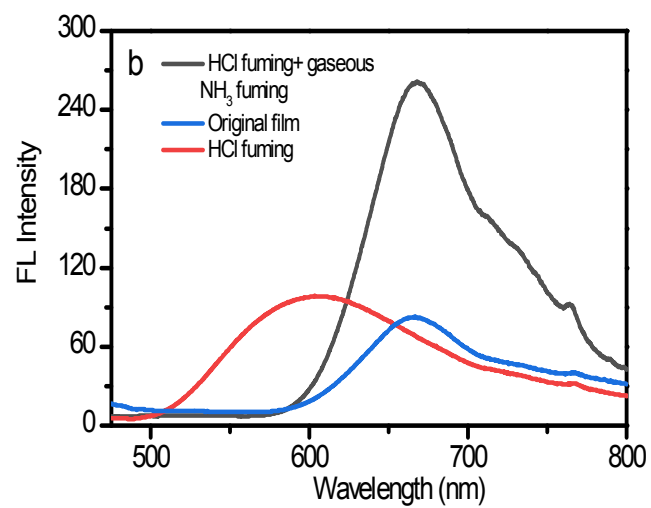

Figure S18 (a) UV-vis and (b) emission spectra of 1 wt% **SFX-2SP**-loaded PMMA film upon HCl and gaseous  $\text{NH}_3$  fuming.

Table S1 The absolute quantum yield of solution in EtOH with increasing irradiation time.

| Entry | Irradiation time (min) | Absolute quantum yield |
|-------|------------------------|------------------------|
| 1     | 0                      | 0.07                   |
| 2     | 4                      | 0.11                   |
| 3     | 8                      | 0.10                   |

Table S2 The absolute quantum yield of 1 wt% **SFX-2SP**-loaded PMMA film with increasing irradiation time.

| Entry | Irradiation time (min) | Absolute quantum yield |
|-------|------------------------|------------------------|
| 1     | 0                      | 0.04                   |
| 2     | 2                      | 0.14                   |
| 3     | 4                      | 0.16                   |
| 4     | 6                      | 0.17                   |
| 5     | 10                     | 0.16                   |
| 6     | 20                     | 0.15                   |

Table S3 The fluorescence lifetime of 1 wt% **SFX-2SP**-loaded PMMA film with increasing irradiation time.

| Entry | Irradiation time (min) | fluorescence lifetime (ns) |
|-------|------------------------|----------------------------|
| 1     | 0                      | 2.568                      |
| 2     | 0.5                    | 2.235                      |
| 3     | 1                      | 2.206                      |
| 4     | 2                      | 2.116                      |
| 5     | 4                      | 2.099                      |
| 6     | 6                      | 2.090                      |
| 7     | 8                      | 2.102                      |
| 8     | 12                     | 2.104                      |
| 9     | 16                     | 2.097                      |
| 10    | 20                     | 2.133                      |

Table S4 The fluorescence lifetime of **SFX-2SP** solution in EtOH with increasing irradiation time.

| Entry | Irradiation time (min) | fluorescence lifetime (ns) |
|-------|------------------------|----------------------------|
| 1     | 0                      | 4.099                      |
| 2     | 1                      | 3.592                      |
| 3     | 2                      | 3.476                      |
| 4     | 4                      | 2.255                      |
